# Supplementary material for: An optical deoxyribonucleic acid-based half-subtractor
Source: Royal Society of Chemistry journal article supplement (doi:10.1039/c3cc44823a), 2013-01-01
Supplement: c3cc44823a.pdf [file c3cc44823a.pdf]

## An Optical Deoxyribonucleic Acid-based Half-subtractor

Chia-Ning Yang,<sup>a,\*</sup> Yi-Li Chen,<sup>b</sup> Hung-Yin Lin,<sup>b</sup> and Chun-Yu Hsu<sup>a</sup>

<sup>a</sup> Institute of Biotechnology, National University of Kaohsiung, Kaohsiung, Taiwan.

<sup>b</sup> Department of Chemical and Materials Engineering, National University of Kaohsiung, Kaohsiung, Taiwan.

### Experimental procedures

All oligonucleotides (dual-gate, Input I<sub>A</sub> and I<sub>B</sub>) were purchased from Yao-Hong Biotechnology Inc. (HPLC grade, New Taipei City, Taiwan). Sodium chloride (A. R. grade), potassium chloride, potassium dihydrogen phosphate (KH<sub>2</sub>PO<sub>4</sub>, >99.9%), and sodium phosphate dibasic (Na<sub>2</sub>HPO<sub>4</sub>, >99%) were purchased from J.T. Baker (Phillipsburg, NJ). Deionized water used in the preparation of phosphate buffered saline (PBS, 110 mM NaCl, 2 mM KCl, 8 mM Na<sub>2</sub>HPO<sub>4</sub>, 2 mM KH<sub>2</sub>PO<sub>4</sub>, pH=7.4) and for rinse solutions was 18.2 MΩ, produced by PURELAB Ultra (ELGA, Albania). All chemicals were used as received unless otherwise mentioned.

Two microliters of 50 μM dual-gate molecules were dissolved in PBS and pipetted on a screen-printed gold substrate (4 mm diameter, DropSens, Spain) for immobilization for 30 min. The dual gate-coated Au surface was then rinsed with 500 μL PBS to remove unbound molecules. Hybridization of the hairpin probes on Au was performed at room temperature for 30 min<sup>ref\*</sup> after the same number (i.e. 2 μL 50 μM) of I<sub>A</sub> and I<sub>B</sub> molecules were applied under the same buffer conditions. All processes including dual-gate immobilization and hybridization were covered with aluminum foil in order to prevent photobleaching.

The fluorescence intensities were monitored with a fluorescence spectrophotometer (F7000, Hitachi High-Technologies, Japan) equipped with a solid sample holder. The emission wavelengths were 520 nm and 694 nm for fluorescein and Cy5, respectively. The relative intensities of samples were calculated by  $(I_{\text{hybrid}} - I_{\text{blank}}) / I_{\text{blank}}$ , where  $I_{\text{hybrid}}$  and  $I_{\text{blank}}$  were the fluorescence intensities of dual-gate on gold after and before hybridization with the target sequences.

**ref\*:** see ref 6 in the text.
